# Supplementary material for: Mechanical Properties, Tissue Structure, and Elemental Composition of the Walking Leg Tips of Coconut Crabs
Source: MDPI journal article supplement (doi:10.3390/jmse12040639), 2024-04-10
Supplement: s1 [file s1]

Archive with 1 entries (1 files):
- jmse-2945121-supplementary.pdf
